# Supplementary material for: The energy–diversity relationship of complex bacterial communities in Arctic deep-sea sediments
Source: PubMed Central journal article supplement — ISME J. 2011 Nov 10;6(4):724–32. doi: 10.1038/ismej.2011.140 (PMC3309351; doi:10.1038/ismej.2011.140), 2011-11-10
Supplement: ismej2011140x1.pdf [file ismej2011140x1.pdf]

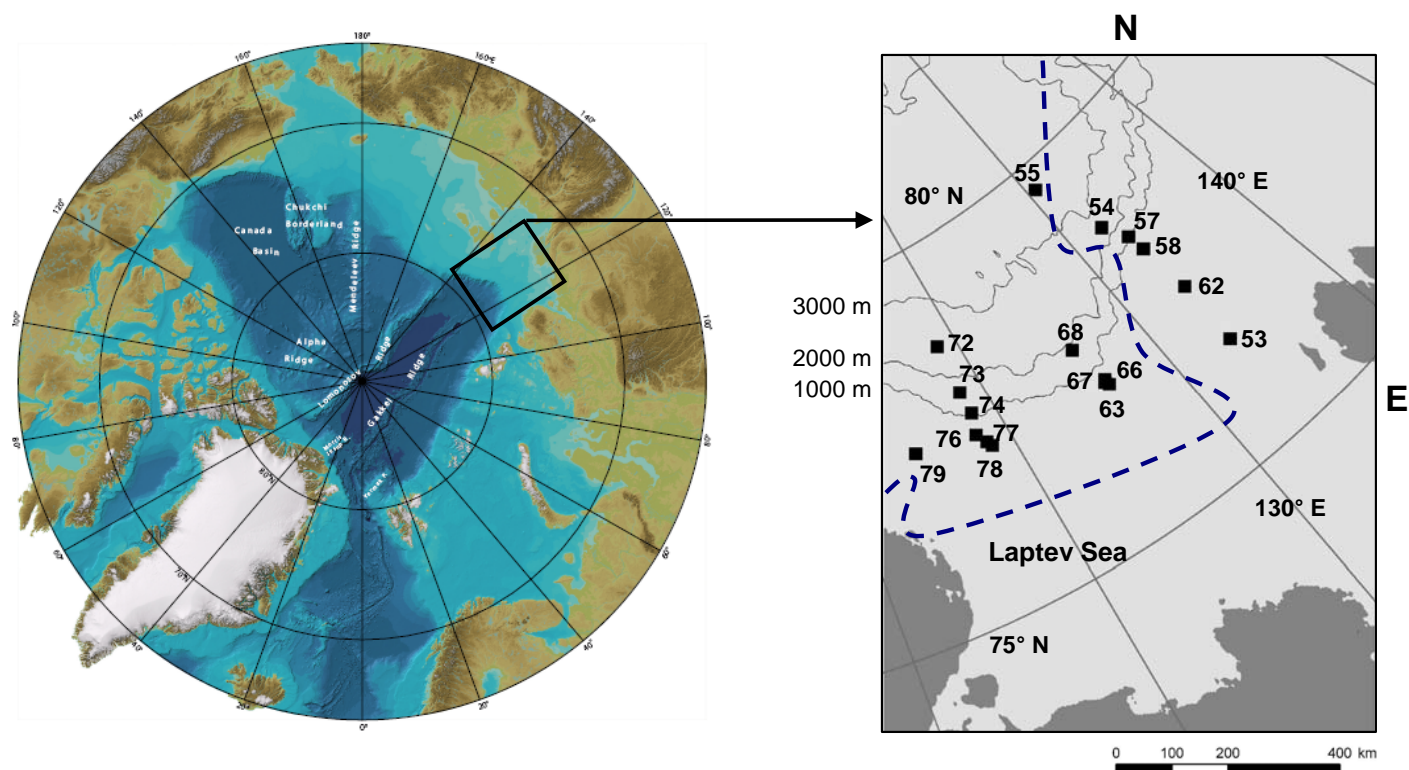

**Figure S1** Map of the sampling area in the Arctic Ocean with three water depth transects in the Laptev Sea. The ice cover at the time of sampling is indicated by the dotted line, where the eastern part was ice free and the western part mostly ice covered. (Left: <http://www.ngdc.noaa.gov/mgg/bathymetry/arctic>, right: the map was generated in ArcMap (ArcGIS Desktop 9.3; ESRI, Kranzberg, Germany). The bathymetry was obtained from Jakobsson et al. (2008).
