# Supplementary material for: The energy–diversity relationship of complex bacterial communities in Arctic deep-sea sediments
Source: PubMed Central journal article supplement — ISME J. 2011 Nov 10;6(4):724–32. doi: 10.1038/ismej.2011.140 (PMC3309351; doi:10.1038/ismej.2011.140), 2011-11-10
Supplement: ismej2011140x2.pdf [file ismej2011140x2.pdf]

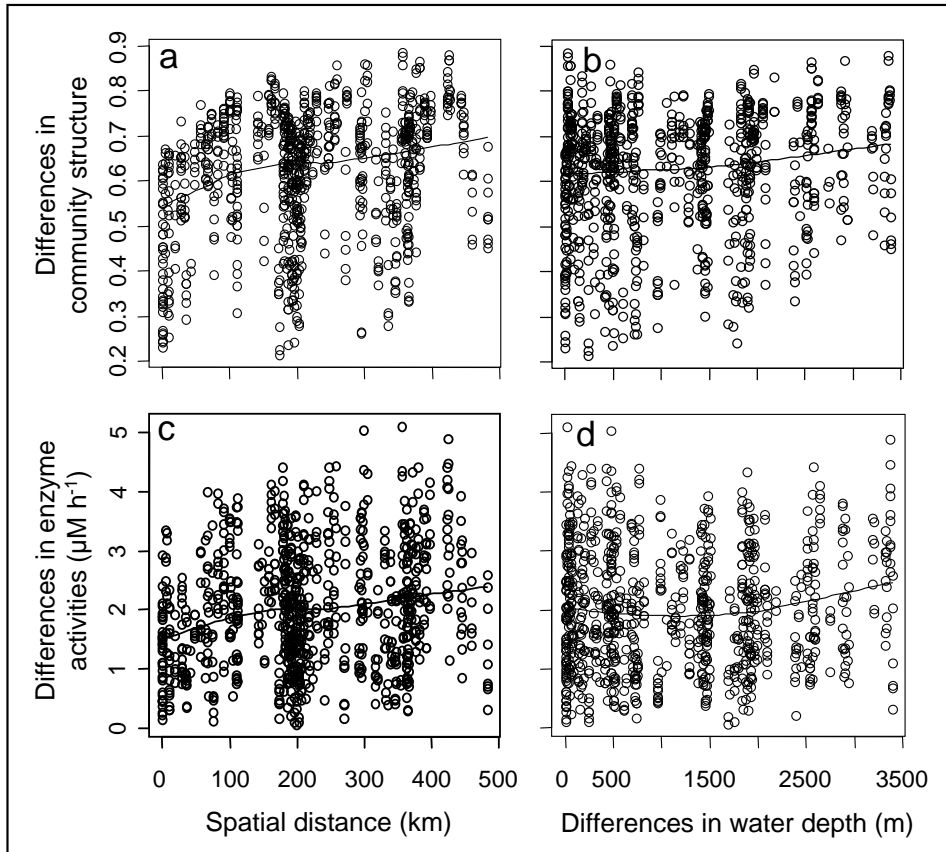

**Figure S2** Scatterplots with LOESS curves displaying the relationships between differences in ARISA community structure and a) spatial distance (Spearman's  $r = 0.24$ ,  $p < 0.001$  as tested by 999 Monte Carlo permutations), and b) differences in water depth ( $r = 0.14$ ,  $p = 0.011$ ), as well as relationships between differences in enzyme activities (esterase, lipase, peptidase, beta-glucosidase) and c) spatial distance ( $r = 0.17$ ,  $p = 0.003$ ), and d) differences in water depth ( $r = 0.05$ ,  $p = 0.22$ ).
