# Supplementary material for: The energy–diversity relationship of complex bacterial communities in Arctic deep-sea sediments
Source: PubMed Central journal article supplement — ISME J. 2011 Nov 10;6(4):724–32. doi: 10.1038/ismej.2011.140 (PMC3309351; doi:10.1038/ismej.2011.140), 2011-11-10
Supplement: ismej2011140x3.pdf [file ismej2011140x3.pdf]

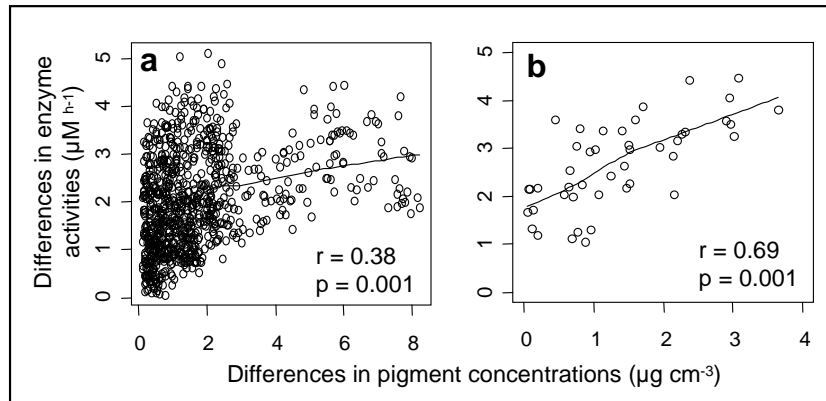

**Figure S3** Changes in enzyme activities (esterase, lipase, peptidase, beta-glucosidase) with changing pigment concentrations a) for the full dataset, and b) for a reduced dataset only including samples used for 454 MPTS. Spearman correlations as tested with the Mantel test and 999 permutations are indicated in the figure.
