# Supplementary material for: The energy–diversity relationship of complex bacterial communities in Arctic deep-sea sediments
Source: PubMed Central journal article supplement — ISME J. 2011 Nov 10;6(4):724–32. doi: 10.1038/ismej.2011.140 (PMC3309351; doi:10.1038/ismej.2011.140), 2011-11-10
Supplement: ismej2011140x4.pdf [file ismej2011140x4.pdf]

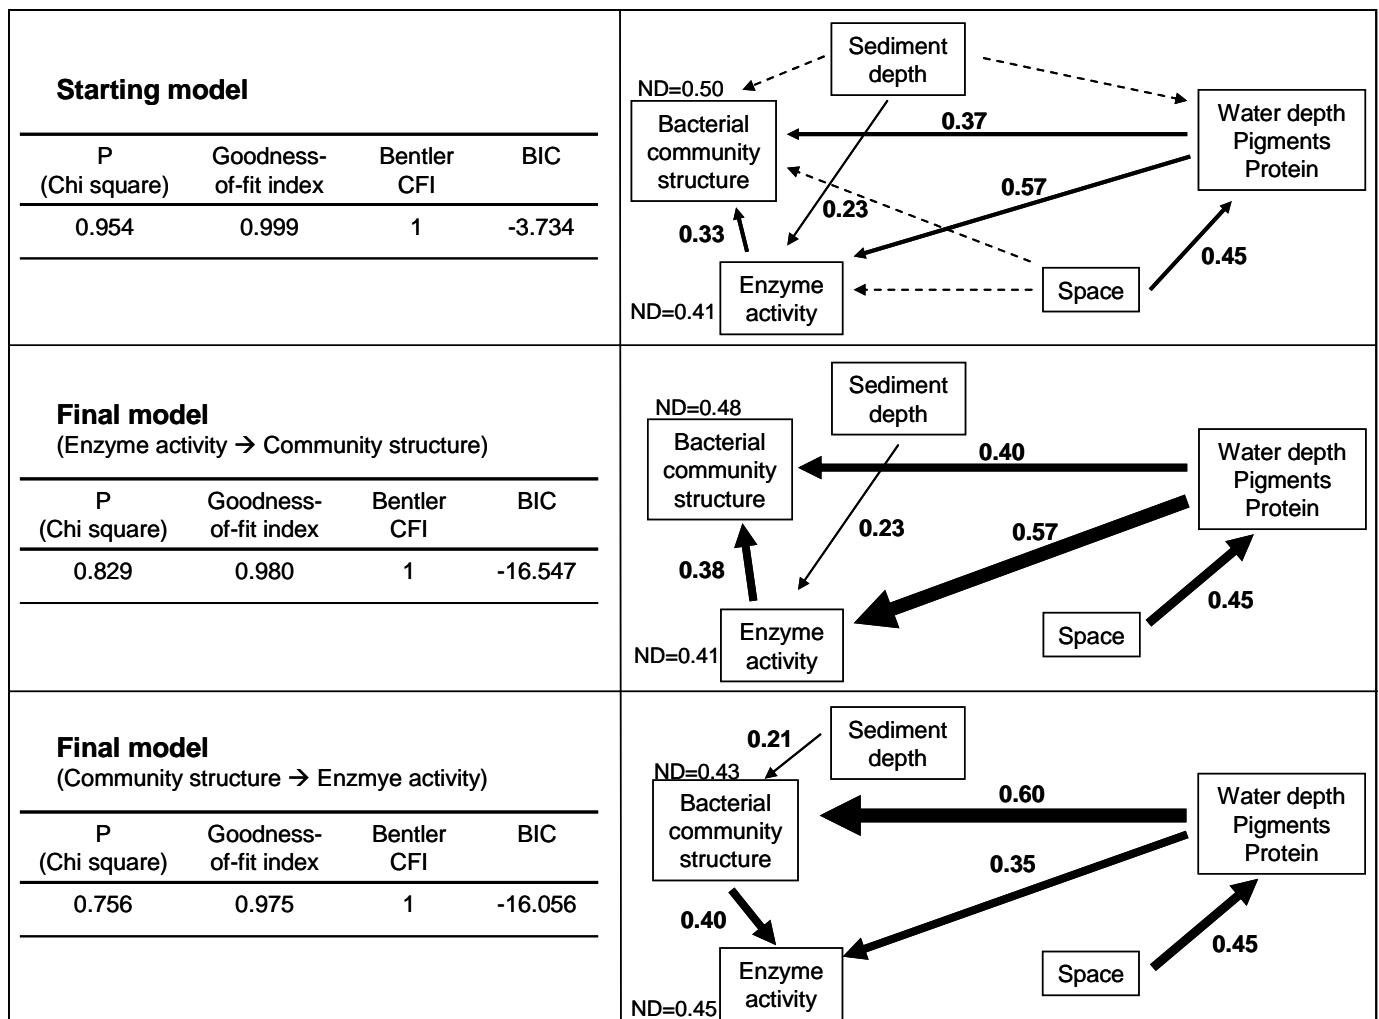

**Figure S4** Initial and final path models obtained with structural equation modeling. In the final model (E→A) the path is directed from enzyme activities to ARISA and in final model (A→E) the direction of the path is reversed. The tables show the significance value for the Chi-square test, assessing whether the model is significantly different from a correlation matrix of the data based on the RV coefficient. The goodness-of-fit index and Bentler CFI (Comparative Fit Index) indicate the goodness of fit of the model, the best fit would result in a value of 1. The BIC (Bayesian Information Criterion) is another measure of the goodness of fit and needs to be minimized. The coefficient of non-determination (ND = 1-R<sup>2</sup>) determines the fraction of the variance in bacterial community structure and enzyme activity that is not explained by the model.
